# Supplementary material for: Distribution status and influencing factors of antibiotic resistance genes in the Chaohu Lake, China
Source: PeerJ. 2025 Apr 25;13:e19384. doi: 10.7717/peerj.19384 (PMC12036580; doi:10.7717/peerj.19384)
Supplement: Supplemental Information 3 [file peerj-13-19384-s003.xlsx]

## Sheet: Sheet1
Table S1. Basic data of each sample and sequencing data obtained by shotgun metagenomic sequencing after quality control.
Sample name	group	longitude (°E)	latitude (°N)	TN	TP	NH3-N	NO3-N	NO2-N	PO4	CODMn	Total reads (M)	Total bases (G)	Q20 bases	Q30 bases	GC content	Genome number obtainning through binning	Total genome size (Mb) obtainning through binning	Average contigs obtainning through binning	Average contig N50 obtainning through binning
CHE01	CHE	117.68	31.61	1.34	0.046	0.54	0.46	0.0016	0.011	5.95	164.75	24.06	0.9746	0.9274	0.455	173	276.847	290.48	14719.6
CHE02	CHE	117.75	31.6	1.31	0.063	0.11	0.55	0.018	0.013	9.79	159.11	23.87	0.973	0.9229	0.4574	172	217.317	226.616	14180.2
CHE03	CHE	117.57	31.55	2.18	0.041	0.77	0.53	0.0093	0.019	4.03	94.98	14.05	0.9678	0.9087	0.4514	117	146.681	215.487	19652.1
CHE04	CHE	117.65	31.53	2.56	0.037	0.29	1.6	0.0599	0.015	13.63	132.67	19.61	0.9676	0.9089	0.4573	155	223.455	246.955	15473.3
CHE05	CHE	117.55	31.47	1.72	0.054	0.7	0.52	0.0075	0.009	5.18	165.16	24.77	0.9725	0.9217	0.4607	192	262.546	241.38	13998.4
CHW01	CHW	117.34	31.68	2.15	0.076	0.39	1.16	0.0142	0.017	13.63	179.91	26.07	0.9762	0.9318	0.4636	135	205.349	311.778	8581.07
CHW02	CHW	117.41	31.65	0.69	0.033	0.16	0.36	0.0157	0.017	12.86	140.32	20.69	0.9706	0.9163	0.4564	124	208.096	313.766	14816.9
CHW03	CHW	117.34	31.63	1.62	0.054	0.6	0.57	0.0039	0.015	8.83	110.88	16.32	0.968	0.9096	0.4531	120	205.444	294.75	13231
CHW04	CHW	117.36	31.59	1.7	0.084	0.26	0.52	0.0021	0.029	6.72	125.77	18.33	0.9733	0.9241	0.4599	87	146.561	351.437	8901.41
CHW05	CHW	117.44	31.57	1.42	0.037	0.13	0.55	0.0187	0.021	4.99	140.03	20.67	0.973	0.9226	0.4586	159	212.229	237.138	14380.9
Total											1413.58	208.44					2104.53
Average																143.4
