# Supplementary material for: Distribution status and influencing factors of antibiotic resistance genes in the Chaohu Lake, China
Source: PeerJ. 2025 Apr 25;13:e19384. doi: 10.7717/peerj.19384 (PMC12036580; doi:10.7717/peerj.19384)
Supplement: Supplemental Information 4 [file peerj-13-19384-s004.xlsx]

## Sheet: antibioti-gene_relatively
Table S2. Relative abundances of anbitiobic resistance genes in the Chaohu Lake.
antibiotic_gene	CHE01	CHE02	CHE03	CHW05	CHW03	CHW02	CHE05	CHE04	CHW04	CHW01	mean	S.E.
bacitracin__bacA	0.28016	0.334282	0.42822	0.228646	0.385525	0.247098	0.227099	0.230337	0.273144	0.339182	0.297369	0.0225015
multidrug__multidrug_ABC_transporter	0.284365	0.154027	0.119734	0.235548	0.235456	0.16187	0.171666	0.117284	0.233319	0.183072	0.189634	0.0175167
multidrug__mdtB	0.0484629	0.0476421	0.0543825	0.0817013	0.0598187	0.0618741	0.0796092	0.0690444	0.040623	0.0506867	0.0593845	0.00436732
multidrug__mexF	0.0893749	0.0632825	0.0477276	0.0621591	0.0342527	0.0521635	0.0816675	0.0730845	0.0549859	0.0423806	0.0601079	0.00550698
multidrug__mdtC	0.0625382	0.0302416	0.0319568	0.0471877	0.0414501	0.0331591	0.0562842	0.0202943	0.0623197	0.0444615	0.0429893	0.00453463
multidrug__mexW	0.0258155	0.0375259	0.0254829	0.00495481	0.0161963	0.0946156	0.045799	0.0224402	0.0355846	0.00950066	0.0317916	0.00803714
unclassified__cAMP-regulatory protein	0.028395	0.0277983	0.0295425	0.0228703	0.0381105	0.0231184	0.0392547	0.0287028	0.0141927	0.0143569	0.0266342	0.00266714
multidrug__multidrug_transporter	0.0185618	0.0182276	0.00763921	0.0281099	0.0294806	0.0246051	0.0604894	0.00816531	0.00914702	0.0279485	0.0232375	0.00493341
polymyxin__arnA	0	0.0193894	0.0171695	0.0157559	0.0230813	0.00196166	0.0238149	0.0411847	0.0548226	0.0492092	0.0246389	0.00584543
multidrug__mexD	0.0156921	0.023424	0	0	0.00711616	0.00931787	0.00464088	0.172412	0.00275567	0	0.0235359	0.0167159
multidrug__mdtA	0	0	0	0	0	0.0574659	0	0	0.00374227	0.0648858	0.0126094	0.00812167
macrolide-lincosamide-streptogramin__macB	0.012948	0.0111272	0.0213887	0.0011839	0.00688829	0.014632	0.01398	0.0272207	0.0200091	0.0162735	0.0145651	0.00233821
sulfonamide__sul1	0.0106655	0.00687016	0.0247358	0.00941299	0.0136737	0.0100816	0.0187715	0.0064102	0.0110844	0.0167009	0.0128407	0.00181488
multidrug__acrB	0.00154023	0.0121638	0.0112796	0.0122075	0.024044	0.0123568	0.0275341	0.0185862	0	0.00596387	0.0125676	0.00282269
bacitracin__bcrA	0.00930907	0.0135219	0.0137044	0.00167233	0.00123428	0.00815988	0.00402022	0.0256855	0.0107128	0.0305319	0.0118552	0.00306525
multidrug__qacEdelta1	0.00697773	0.0108694	0.0130116	0.00836678	0.00883941	0.0102527	0.0132945	0.0104147	0.0122687	0.0110935	0.0105389	0.000645517
aminoglycoside__aac(6')-II	0.0189037	0.00918678	0.0195465	0.0145369	0.0156723	0.00582812	0.0106842	0.0117873	0	0.00486893	0.0111015	0.00199748
aminoglycoside__aac(2')-I	0	0.00943883	0.00906871	0.0111865	0	0.0314904	0	0	0.00979107	0	0.00709755	0.00312735
tetracycline__tetV	0	0.00715322	0	0.0169559	0	0.0255781	0	0	0.0156259	0	0.00653131	0.00300092
fosmidomycin__rosA	0.0116046	0	0	0.0156475	0	0.00479295	0.0062925	0	0.00976737	0.013433	0.00615378	0.00194146
trimethoprim__dfrB6	0.0124125	0.0255034	0.0216229	0.00988284	0	0	0	0	0.00465032	0	0.00740719	0.00305991
kasugamycin__kasugamycin resistance protein ksgA	0	0.0162213	0	0	0.00123428	0.00292773	0.0250093	0.00614827	0.00661133	0	0.00581521	0.0026709
sulfonamide__sul2	0.00338182	0.00397256	0	0.00156581	0	0	0.00471938	0.0229412	0	0.0179972	0.00545779	0.00259115
tetracycline__tetP	0	0.0159316	0.00750038	0.00156581	0.0030792	0.00665899	0	0.00600496	0.00484991	0.00407444	0.00496653	0.00147522
multidrug__emrB	0.00747467	0	0	0.0160269	0.0112655	0	0	0	0.0129108	0	0.00476779	0.00205214
fosmidomycin__rosB	0	0.00979777	0	0.00502375	0	0.0109124	0	0	0.0115438	0	0.00372777	0.00161456
multidrug__EmrB-QacA family major facilitator transporter	0.00677215	0.00696498	0	0.0205444	0	0.00394538	0	0	0	0	0.00382269	0.00207065
multidrug__mexB	0	0	0.00713168	0.00939484	0	0.0054157	0	0.00596485	0.00304587	0.00488407	0.0035837	0.00109917
tetracycline__tetM	0	0.0249035	0	0.0137503	0	0	0	0.000562448	0	0	0.00392162	0.00269934
vancomycin__vanR	0	0.00164035	0.0161868	0.0184122	0	0	0	0	0.00483375	0	0.00410731	0.00225679
multidrug__mexI	0	0	0	0	0.00488869	0	0.00411056	0.00784035	0.00958824	0.00227661	0.00287045	0.00114013
macrolide-lincosamide-streptogramin__srmB	0	0	0	0.00156581	0	0.0138833	0	0.00460821	0	0	0.00200574	0.00139922
multidrug__bpeF	0.00589072	0	0	0	0	0.0035428	0.00511818	0.00371216	0.00639484	0	0.00246587	0.000864849
multidrug__ceoB	0	0	0	0	0	0.00392918	0.00281852	0.0140109	0.00540323	0	0.00261619	0.00141594
puromycin__puromycin resistance protein	0	0.0139857	0	0	0.00266729	0.00134085	0.00157313	0.0046402	0	0.00150622	0.00257134	0.00135265
multidrug__cmeB	0	0	0	0.00272017	0	0.00449377	0.00659269	0.00565892	0	0.00305883	0.00225244	0.000827995
rifamycin__ADP-ribosylating transferase_arr	0	0	0	0.0128322	0	0.0035428	0	0	0.00578546	0	0.00221605	0.0013399
unclassified__cob(I)alamin adenolsyltransferase	0	0	0	0	0.0044571	0.00168996	0.0151936	0.00115302	0	0	0.00224937	0.00150665
macrolide-lincosamide-streptogramin__vatB	0	0	0	0	0.0011985	0	0.00479254	0.00525054	0.00701675	0.00309227	0.00213506	0.000851046
multidrug__mexT	0	0.0099437	0	0.00268797	0.00388104	0.00289329	0	0	0	0	0.0019406	0.00101037
beta-lactam__class A beta-lactamase	0	0.00683768	0	0.00392197	0	0	0	0	0.0102523	0	0.0021012	0.0011695
carbomycin__carA	0.00476932	0	0	0	0	0.00181927	0	0.0101665	0	0.00319438	0.00199495	0.00105315
multidrug__amrB	0	0.00576293	0	0	0	0.00311974	0	0	0	0.00612635	0.0015009	0.000802421
aminoglycoside__aac(3)-I	0	0	0	0	0.00544203	0	0	0	0.00956594	0	0.0015008	0.00104668
multidrug__oprC	0	0	0	0	0	0.00320605	0.00822847	0	0.0028067	0	0.00142412	0.000853638
others	0.0339839	0.0223629	0.0729672	0.0620014	0.0210465	0.0362564	0.0369412	0.0182843	0.0208448	0.0292409	0.0353929	0.00581451
