# Supplementary material for: Distribution status and influencing factors of antibiotic resistance genes in the Chaohu Lake, China
Source: PeerJ. 2025 Apr 25;13:e19384. doi: 10.7717/peerj.19384 (PMC12036580; doi:10.7717/peerj.19384)
Supplement: Supplemental Information 5 [file peerj-13-19384-s005.xlsx]

## Sheet: Sheet1
Table S3. Relative abundances of phyla in the Chaohu water microbota.
Phylum	CHE01_metagenome	CHE02_metagenome	CHE03_metagenome	CHE04_metagenome	CHE05_metagenome	CHW01_metagenome	CHW02_metagenome	CHW03_metagenome	CHW04_metagenome	CHW05_metagenome
k__Bacteria|p__Proteobacteria	47.3315	49.616	53.399	51.5807	54.3654	48.0222	43.1395	39.4988	54.7426	55.0176
k__Bacteria|p__Actinobacteria	34.2636	35.7685	30.1442	34.7802	35.9598	33.9635	35.4347	37.7944	37.4417	34.9899
k__Bacteria|p__Acidobacteria	15.1602	11.8567	13.0961	9.92033	7.34775	6.38308	7.65688	6.18176	3.43013	6.6534
k__Bacteria|p__Cyanobacteria	1.59678	1.5796	2.27967	2.53725	1.26168	10.1475	12.4884	14.7551	1.83128	2.23952
k__Bacteria|p__Bacteroidetes	1.29152	1.0651	0.95699	1.06039	0.96539	1.07035	1.09172	1.35516	2.26441	0.99383
k__Bacteria|p__Candidatus_Kryptonia	0.25242	0.0702	0.0895	0.06416	0.03444	0.13019	0.05179	0.11935	0.03422	0.043
k__Bacteria|p__Verrucomicrobia	0.09488	0.02998	0.03144	0.03948	0.03741	0.26229	0.10655	0.24752	0.15709	0.04769
k__Bacteria|p__Planctomycetes	0.0091	0.01158	0.00275	0.01643	0.02621	0.00942	0.01293	0.00361	0.00814	0.01238
k__Bacteria|p__Nitrospirae	0	0.00231	0.00039	0.00108	0.00182	0.0097	0.01154	0.00075	0.00318	0.00269
k__Bacteria|p__Armatimonadetes	0	0	0	0	8e-05	0.00093	0.00479	0.03934	0	0
k__Bacteria|p__Candidatus_Saccharibacteria	0	0	0	0	0	0.00082	0.0012	0.00412	0.00716	0
k__Archaea|p__Thaumarchaeota	0	0	0	0	0	0	0	0	0.08007	0
Total	100	100	100	100	100	100	100	100	100	100
