# Supplementary material for: Distribution status and influencing factors of antibiotic resistance genes in the Chaohu Lake, China
Source: PeerJ. 2025 Apr 25;13:e19384. doi: 10.7717/peerj.19384 (PMC12036580; doi:10.7717/peerj.19384)
Supplement: Supplemental Information 6 [file peerj-13-19384-s006.xlsx]

## Sheet: dominant_species
Table S4. Dominant species in the Chaohu Lake water.
dominant_species	ECL01	ECL02	ECL03	ECL04	ECL05	WCL01	WCL02	WCL03	WCL04	WCL05	mean	S.E.
Candidatus_Fonsibacter_ubiquis	29.6923	28.9144	32.0485	30.537	31.3919	28.4432	26.8939	21.0817	28.0459	30.9357	28.7985	0.997551
GGB34754_SGB82226	15.807	16.8853	14.2784	15.5472	16.7515	13.6831	13.5148	18.7583	16.2173	15.6553	15.7098	0.505863
GGB74065_SGB52643	15.1602	11.8567	13.0961	9.92033	7.34686	6.38202	7.65681	6.18176	3.42998	6.6532	8.76841	1.15019
Candidatus_Methylopumilus_rimovensis	8.10747	9.11837	10.1866	9.14656	10.4594	9.26688	6.77466	7.77541	9.70553	11.6062	9.21471	0.443748
GGB24856_SGB81948	6.4672	5.45912	4.58252	5.39292	6.15435	6.18175	6.26313	6.29514	6.94306	6.99542	6.07346	0.234001
GGB32489_SGB48813	6.37511	6.93781	6.2388	7.30978	7.47997	6.83288	8.59785	6.78488	6.74144	7.24258	7.05411	0.211446
GGB25977_SGB37971	4.82722	5.86343	4.6794	5.48928	5.53943	4.5618	3.60154	5.45747	7.64436	5.79512	5.34591	0.336549
GGB38373_SGB52357	3.56641	4.37255	3.43034	3.72854	3.66922	3.11057	3.25745	3.32738	3.31229	3.17874	3.49535	0.116904
Polynucleobacter_sp_MWH_UH24A	1.95988	2.43937	3.3594	3.11012	3.232	2.9187	2.79102	2.68985	4.10008	3.37416	2.99746	0.185228
Cyanobium_sp_FACHB_13342	1.46372	0.729	0.95072	1.01716	0.90133	0.99617	0.69008	0.72213	0.65398	0.96491	0.90892	0.0754408
GGB43067_SGB57480	1.24794	1.41172	1.46138	1.59528	2.02642	0.79981	1.19319	0.80077	1.54762	1.57275	1.36569	0.118298
actinobacterium_SCGC_AAA028_A23	0.88379	0.87905	0.74824	0.90775	0.79848	1.24225	2.2315	1.08916	1.19987	0.85947	1.08396	0.137964
GGB43022_SGB60257	0.5673	0.51791	0.45711	0.59471	0.60255	0.48046	0.36499	0.56587	1.29017	0.6297	0.607077	0.0799764
Microcystis_aeruginosa	0.0884	0.74829	1.32885	0.59433	0.35707	9.05321	11.5533	13.0097	0.75602	1.27337	3.87626	1.63111
Dolichospermum_circinale	0.02158	0.09975	0	0.92508	0.00189	0.0895	0.2449	1.01323	0.27034	0	0.266627	0.121243
Mycolicibacterium_fluoranthenivorans	0	0	0	0.20216	0	1.61929	0	0	0.47585	0	0.22973	0.161989
